# Supplementary material
Source: publisher site journal article supplement (https://www.dovepress.com/article/552589)
Supplement: Supplementary file 1 [file 552589%20Revised%20Appendix%201-4.pdf]

# Appendix

Table 1: List of neurotoxic chemotherapy drugs used by chemotherapy group, and sources utilised for their neurotoxicity effects.

| Type (names) of the chemotherapy                                            | WHO ATC code*                 | Source (Author year)                                                                    |
|-----------------------------------------------------------------------------|-------------------------------|-----------------------------------------------------------------------------------------|
| <b>Antimetabolite - Pyrimidine analogues (Fluorouracil)</b>                 | L01BC02                       | (Verstappen, Heimans et al. 2003; Was, Borkowska et al. 2022)                           |
| <b>Vinca Alkaloids (included Vinblastine, Vincristine and Vinorelbine)</b>  | L01CA01<br>L01CA02<br>L01CA04 | (Verstappen, Heimans et al. 2003; Magge and DeAngelis 2015; Was, Borkowska et al. 2022) |
| <b>Bortezomib</b>                                                           | L01XX32                       | (Magge and DeAngelis 2015; Was, Borkowska et al. 2022)                                  |
| <b>Taxanes (Paclitaxel, Docetaxel and Cabazitaxel)</b>                      | L01CD01<br>L01CD02<br>L01CD04 | (Verstappen, Heimans et al. 2003; Was, Borkowska et al. 2022)                           |
| <b>Platinum compounds (included Cisplatin, Carboplatin and Oxaliplatin)</b> | L01XA01<br>L01XA02<br>L01XA03 | (Verstappen, Heimans et al. 2003; Magge and DeAngelis 2015; Teng, Cohen et al. 2022)    |

\*World Health Organisation (WHO) Anatomical Therapeutic Chemicals (ATC) classification codes

Magge, R. S. and L. M. DeAngelis (2015). "The double-edged sword: Neurotoxicity of chemotherapy." *Blood Reviews* **29**(2): 93-100.

Teng, C., J. Cohen, S. Egger, P. L. Blinman and J. L. Vardy (2022). "Systematic review of long-term chemotherapy-induced peripheral neuropathy (CIPN) following adjuvant oxaliplatin for colorectal cancer." *Supportive Care in Cancer* **30**(1): 33-47.

Verstappen, C. C. P., J. J. Heimans, K. Hoekman and T. J. Postma (2003). "Neurotoxic Complications of Chemotherapy in Patients with Cancer." *Drugs* **63**(15): 1549-1563.

Was, H., A. Borkowska, A. Bagues, L. Tu, J. Y. H. Liu, Z. Lu, J. A. Rudd, K. Nurgali and R. Abalo (2022). "Mechanisms of Chemotherapy-Induced Neurotoxicity." *Front Pharmacol* **13**: 750507.

Table 2: Podiatry service use among people with CRC, comparison between chemotherapy and non-chemotherapy groups across annual increments before and after diagnosis.

| Any chemotherapy vs no chemotherapy |                 |                                   |                            |                       | Unadjusted           |                         |                     | Adjusted*            |                         |                          |
|-------------------------------------|-----------------|-----------------------------------|----------------------------|-----------------------|----------------------|-------------------------|---------------------|----------------------|-------------------------|--------------------------|
| Time period                         | Treatment group | No. receiving ≥1 podiatry service | Total number persons alive | Rate per 1000 persons | Incidence rate ratio | 95% Confidence interval | p-value             | Incidence rate ratio | 95% Confidence interval | p-value <sup>†</sup>     |
| <b>3 - &lt;4yrs pre-dx</b>          | Chemotherapy    | 59                                | 1535                       | 38.44                 | 0.637                | 0.463 – 0.876           | 0.006 <sup>†</sup>  | 0.932                | 0.665 – 1.307           | 0.684                    |
|                                     | No chemo        | 106                               | 1757                       | 60.33                 |                      |                         |                     |                      |                         |                          |
| <b>2 - &lt;3yrs pre-dx</b>          | Chemotherapy    | 81                                | 1535                       | 52.77                 | 0.576                | 0.441 – 0.752           | <0.001 <sup>†</sup> | 0.804                | 0.606 – 1.066           | 0.130                    |
|                                     | No chemo        | 161                               | 1757                       | 91.63                 |                      |                         |                     |                      |                         |                          |
| <b>1 - &lt;2yrs pre-dx-</b>         | Chemotherapy    | 120                               | 1535                       | 78.18                 | 0.645                | 0.516 – 0.807           | <0.001 <sup>†</sup> | 0.925                | 0.729 – 1.173           | 0.518                    |
|                                     | No chemo        | 213                               | 1757                       | 121.23                |                      |                         |                     |                      |                         |                          |
| <b>&lt;1yr pre-dx</b>               | Chemotherapy    | 142                               | 1535                       | 92.51                 | 0.663                | 0.540 – 0.816           | <0.001 <sup>†</sup> | 0.944                | 0.758 – 1.176           | 0.608                    |
|                                     | No chemo        | 245                               | 1757                       | 139.44                |                      |                         |                     |                      |                         |                          |
| <b>0 -1yr post-dx</b>               | Chemotherapy    | 173                               | 1535                       | 112.70                | 0.736                | 0.608 – 0.891           | 0.002 <sup>†</sup>  | 1.039                | 0.848 – 1.274           | 0.711                    |
|                                     | No chemo        | 269                               | 1757                       | 153.10                |                      |                         |                     |                      |                         |                          |
| <b>1 - &lt;2yrs post-dx</b>         | Chemotherapy    | 215                               | 1334                       | 161.17                | 0.844                | 0.706 – 1.009           | 0.063               | <b>1.221</b>         | <b>1.010 – 1.476</b>    | <b>0.039<sup>†</sup></b> |
|                                     | No chemo        | 273                               | 1430                       | 190.91                |                      |                         |                     |                      |                         |                          |
| <b>2 - &lt;3yrs post-dx</b>         | Chemotherapy    | 197                               | 1135                       | 173.57                | 0.808                | 0.673 – 0.969           | 0.021 <sup>†</sup>  | 1.159                | 0.956 – 1.406           | 0.132                    |
|                                     | No chemo        | 283                               | 1317                       | 214.88                |                      |                         |                     |                      |                         |                          |
| <b>3 - &lt;4yrs post-dx</b>         | Chemotherapy    | 196                               | 1002                       | 195.61                | 0.822                | 0.686 – 0.984           | 0.033 <sup>†</sup>  | 1.162                | 0.961 – 1.406           | 0.122                    |
|                                     | No chemo        | 297                               | 1248                       | 237.98                |                      |                         |                     |                      |                         |                          |
| <b>4-&lt;5yrs post-dx</b>           | Chemotherapy    | 170                               | 901                        | 188.68                | 0.757                | 0.627 – 0.914           | 0.007 <sup>†</sup>  | 1.039                | 0.853 – 1.267           | 0.702                    |
|                                     | No chemo        | 297                               | 1191                       | 249.37                |                      |                         |                     |                      |                         |                          |

\* Derived from Poisson regression models adjusted for diagnosis year, sex, age, pre-existing diabetes, remoteness, and socioeconomic status. <sup>†</sup>p-value< 0.05 = statistically significant.

Table 3: Podiatry service use among chemotherapy recipients, comparison between neurotoxic chemotherapy and non-neurotoxic chemotherapy groups across annual increments before and after diagnosis.

| Neurotoxic vs non-neurotoxic chemotherapy |                 |                                   |                            |                       | Unadjusted           |                         |                     | Adjusted*            |                         |                      |
|-------------------------------------------|-----------------|-----------------------------------|----------------------------|-----------------------|----------------------|-------------------------|---------------------|----------------------|-------------------------|----------------------|
| Time period                               | Treatment group | No. receiving ≥1 podiatry service | Total number persons alive | Rate per 1000 persons | Incidence rate ratio | 95% Confidence interval | p-value             | Incidence rate ratio | 95% Confidence interval | p-value <sup>+</sup> |
| 3 - <4yrs pre-dx                          | Neurotoxic      | 37                                | 1293                       | 28.62                 | 0.315                | 0.186 – 0.534           | <0.001 <sup>+</sup> | 0.572                | 0.323 – 1.012           | 0.055                |
|                                           | Non-neurotoxic  | 22                                | 242                        | 90.91                 |                      |                         |                     |                      |                         |                      |
| 2 - <3yrs pre-dx                          | Neurotoxic      | 58                                | 1293                       | 44.86                 | 0.472                | 0.291 – 0.765           | 0.002 <sup>+</sup>  | 0.811                | 0.486 – 1.355           | 0.424                |
|                                           | Non-neurotoxic  | 23                                | 242                        | 95.04                 |                      |                         |                     |                      |                         |                      |
| 1 - <2yrs pre-dx-                         | Neurotoxic      | 83                                | 1293                       | 64.19                 | 0.420                | 0.285 – 0.619           | <0.001 <sup>+</sup> | 0.741                | 0.490 – 1.119           | 0.154                |
|                                           | Non-neurotoxic  | 37                                | 242                        | 152.89                |                      |                         |                     |                      |                         |                      |
| <1yr pre-dx                               | Neurotoxic      | 101                               | 1293                       | 78.11                 | 0.461                | 0.321 – 0.663           | <0.001 <sup>+</sup> | 0.779                | 0.530 – 1.146           | 0.205                |
|                                           | Non-neurotoxic  | 41                                | 242                        | 169.42                |                      |                         |                     |                      |                         |                      |
| 0 -1yr post-dx                            | Neurotoxic      | 125                               | 1293                       | 96.67                 | 0.487                | 0.349 – 0.680           | <0.001 <sup>+</sup> | 0.809                | 0.568 – 1.152           | 0.240                |
|                                           | Non-neurotoxic  | 48                                | 242                        | 198.35                |                      |                         |                     |                      |                         |                      |
| 1 - <2yrs post-dx                         | Neurotoxic      | 155                               | 1124                       | 137.90                | 0.483                | 0.358 – 0.650           | <0.001 <sup>+</sup> | 0.821                | 0.595 – 1.133           | 0.230                |
|                                           | Non-neurotoxic  | 60                                | 210                        | 285.71                |                      |                         |                     |                      |                         |                      |
| 2 - <3yrs post-dx                         | Neurotoxic      | 141                               | 954                        | 147.80                | 0.478                | 0.351 – 0.651           | <0.001 <sup>+</sup> | 0.827                | 0.591 – 1.157           | 0.267                |
|                                           | Non-neurotoxic  | 56                                | 181                        | 309.39                |                      |                         |                     |                      |                         |                      |
| 3 - <4yrs post-dx                         | Neurotoxic      | 138                               | 839                        | 164.48                | 0.462                | 0.340 – 0.628           | <0.001 <sup>+</sup> | 0.765                | 0.548 – 1.067           | 0.115                |
|                                           | Non-neurotoxic  | 58                                | 163                        | 355.83                |                      |                         |                     |                      |                         |                      |
| 4-<5yrs post-dx                           | Neurotoxic      | 121                               | 751                        | 161.12                | 0.493                | 0.354 – 0.687           | <0.001 <sup>+</sup> | 0.802                | 0.562 – 1.146           | 0.226                |
|                                           | Non-neurotoxic  | 49                                | 150                        | 326.67                |                      |                         |                     |                      |                         |                      |

\* Derived from Poisson regression models adjusted for diagnosis year, sex, age, pre-existing diabetes, remoteness, and socioeconomic status. <sup>+</sup>p-value< 0.05 = statistically significant.

Table 4 – Factors associated with podiatry service use in the five years after CRC diagnosis.

| Factors                                                                            | Colorectal cancer cohort<br>N=3,292 |           |                     | Chemotherapy recipients<br>N= 1,535 |           |                    |
|------------------------------------------------------------------------------------|-------------------------------------|-----------|---------------------|-------------------------------------|-----------|--------------------|
|                                                                                    | IRR                                 | 95% CI    | p-value             | IRR                                 | 95% CI    | p-value            |
| <b>Age at Diagnosis</b>                                                            |                                     |           |                     |                                     |           |                    |
| Under 60 years                                                                     | 0.46                                | 0.35-0.60 | <0.001 <sup>+</sup> | 0.43                                | 0.31-0.61 | 0.000 <sup>+</sup> |
| 60-69 years                                                                        | 0.73                                | 0.60-0.89 | 0.002 <sup>+</sup>  | 0.62                                | 0.46-0.83 | 0.001 <sup>+</sup> |
| 70-79 years ( <i>Reference group</i> )                                             | 1.00                                | -         | -                   | 1.0                                 | -         | -                  |
| 80+ years                                                                          | 1.28                                | 1.07-1.53 | 0.006 <sup>+</sup>  | 1.04                                | 0.76-1.44 | 0.788              |
| <b>Sex (<i>Reference males</i>)</b>                                                | 1.05                                | 0.90-1.21 | 0.547               | 1.05                                | 0.84-1.32 | 0.662              |
| <b>Charleson Comorbidity Index (CCI)</b>                                           |                                     |           |                     |                                     |           |                    |
| CCI = 0 ( <i>Reference</i> )                                                       | 1.0                                 | -         | -                   |                                     |           |                    |
| CCI = 1                                                                            | 1.12                                | 0.87-1.43 | 0.391               | 0.96                                | 0.64-1.45 | 0.847              |
| CCI = 2+                                                                           | 1.18                                | 0.91-1.52 | 0.216               | 1.15                                | 0.77-1.72 | 0.502              |
| <b>Pre-existing diabetes (<i>yes/no</i>)</b>                                       | 1.26                                | 1.01-1.57 | 0.037 <sup>+</sup>  | 1.31                                | 0.93-1.85 | 0.124              |
| <b>Prior use of podiatry services (<i>yes/no</i>)</b>                              | 4.08                                | 3.48-4.79 | <0.001 <sup>+</sup> | 4.34                                | 3.34-5.64 | 0.000 <sup>+</sup> |
| <b>Received any chemotherapy (<i>yes/no</i>)</b>                                   | 1.17                                | 1.01-1.37 | 0.037 <sup>+</sup>  | -                                   | -         | -                  |
| <b>Received neurotoxic chemotherapy (<i>Reference neurotoxic chemotherapy</i>)</b> | -                                   | -         | -                   | 1.06                                | 0.81-1.39 | 0.677              |

<sup>+</sup>p-value<0.05 = statistically significant
